# Supplementary material for: Intestinal Microbiome Associated with Efficacy of Atezolizumab and Bevacizumab Therapy for Hepatocellular Carcinoma
Source: MDPI journal article supplement (doi:10.3390/cancers16091675), 2024-04-26
Supplement: s1 [file s1]

Supplementary Table S1

|                                    | <b>P.merda(-)</b><br><b>B.stercoris(-)</b><br><b>n=4</b> | <b>P.merdae(+)</b><br><b>B.stercoris(-)</b><br><b>n=12</b> | <b>P.merdae(-)</b><br><b>B.stercoris(+)</b><br><b>n=4</b> | <b>P.merdae(+)</b><br><b>B.stercoris(+)</b><br><b>n=17</b> | <i>P</i> -value |
|------------------------------------|----------------------------------------------------------|------------------------------------------------------------|-----------------------------------------------------------|------------------------------------------------------------|-----------------|
| Age †                              | 83(79-85)                                                | 74(69-79)                                                  | 67(60-73)                                                 | 74(60-79)                                                  | 0.134           |
| Gender (male/female)               | 2/2                                                      | 9/3                                                        | 3/1                                                       | 14/3                                                       | 0.604           |
| Body mass index*                   | 21.7(20.1-23.3)                                          | 22.3(20.5-24.3)                                            | 26.8(25.0-27.3)                                           | 24.6(22.5-28.8)                                            | 0.122           |
| Etiology<br>(HBV/HCV/Alcohol/NBNC) | 3/0/1/0                                                  | 2/4/5/1                                                    | 1/2/0/1                                                   | 3/4/5/5                                                    | 0.470           |
| BCLC stage (A/B/C)                 | 0/1/3                                                    | 0/4/8                                                      | 0/0/4                                                     | 3/4/10                                                     | 0.451           |
| Child-Pugh grade (A/B)             | 3/1                                                      | 12/0                                                       | 4/0                                                       | 15/2                                                       | 0.355           |
| Child-Pugh score (5/6/7)           | 1/2/1                                                    | 11/1/0                                                     | 2/2/0                                                     | 11/4/2                                                     | 0.190           |
| Treatment history (1/2/3/4)        | 3/0/0/1                                                  | 10/2/0/0                                                   | 3/0/0/1                                                   | 14/3/0/0                                                   | 0.192           |
| AST (IU/L) †                       | 134(88-174)                                              | 35(22-43)                                                  | 23(17-28)                                                 | 38(27-47)                                                  | 0.069           |
| ALT (IU/L) †                       | 52(23-107)                                               | 25(15-31)                                                  | 20(17-21)                                                 | 30(27-38)                                                  | 0.040           |
| $\gamma$ -GTP (IU/L) †             | 266(147-447)                                             | 44(33-94)                                                  | 60(51-65)                                                 | 102(70-150)                                                | 0.181           |
| Total bilirubin (mg/dL) †          | 0.9(0.7-1.0)                                             | 0.7(0.6-1.0)                                               | 0.7(0.6-1.1)                                              | 0.8(0.7-1.2)                                               | 0.829           |
| Albumin (g/dL) †                   | 3.0(2.8-3.3)                                             | 3.8(3.5-4.1)                                               | 3.8(3.6-4.0)                                              | 3.7(3.6-4.0)                                               | 0.228           |
| HbA1c (%) †                        | 6.2(5.9-6.8)                                             | 6.1(5.7-6.5)                                               | 5.7(5.6-6.4)                                              | 6.3(6.1-6.8)                                               | 0.772           |
| AFP (ng/mL) †                      | 4336(430-36901)                                          | 670(5-981)                                                 | 190(10-399)                                               | 7(5-13)                                                    | 0.046           |
| PPI (yes/no)                       | 2/2                                                      | 6/6                                                        | 1/3                                                       | 14/3                                                       | 0.098           |
| Antibiotics(yes/no)                | 0/4                                                      | 2/10                                                       | 1/3                                                       | 1/16                                                       | 0.537           |
| C-reactive protein(mg/dL) †        | 1.27(0.82-1.47))                                         | 0.14(0.06-0.36)                                            | 0.11(0.07-0.17)                                           | 0.29(0.14-0.60)                                            | 0.116           |
| NLR †                              | 3.7(3.2-4.1)                                             | 1.7(1.3-2.9)                                               | 2.5(2.1-2.9)                                              | 1.8(1.6-2.8)                                               | 0.294           |

BCLC, the Barcelona Clinic Liver Cancer Classification ; AST, aspartate aminotransferase; ALT, alanine aminotransferase;  $\gamma$ -GTP,  $\gamma$ -glutamyl transpeptidase; AFP,  $\alpha$ -fetoprotein; PPI, protom pump inhibitor; NLR, Neutrophil-Lymphocyte Ratio

† Values are expressed as median (interquartile range).
