# Supplementary material for: Intestinal Microbiome Associated with Efficacy of Atezolizumab and Bevacizumab Therapy for Hepatocellular Carcinoma
Source: MDPI journal article supplement (doi:10.3390/cancers16091675), 2024-04-26
Supplement: s1 [file s1]

Supplementary Figure S1

$\alpha$  -diversity

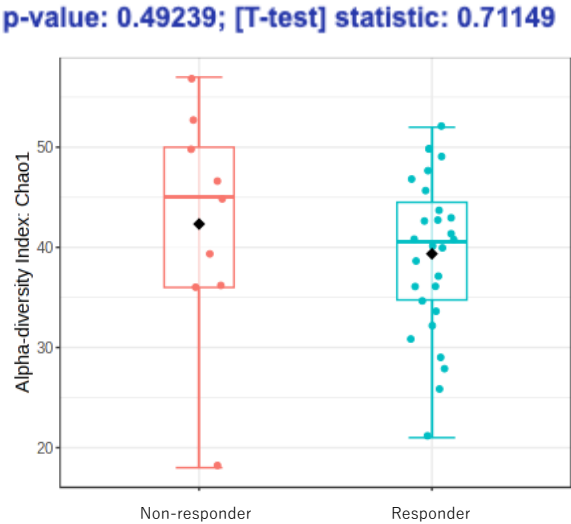

$\beta$  -diversity

[PERMANOVA] F-value: 0.86906; R-squared: 0.024229; p-value: 0.539

- Responder
- Non-responder

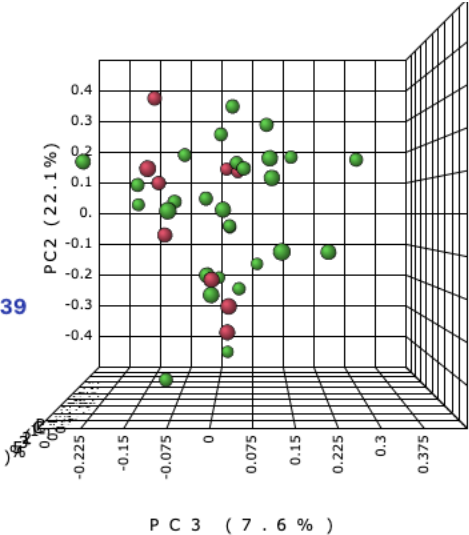

p-value: 0.99904; [T-test] statistic: -0.0012196

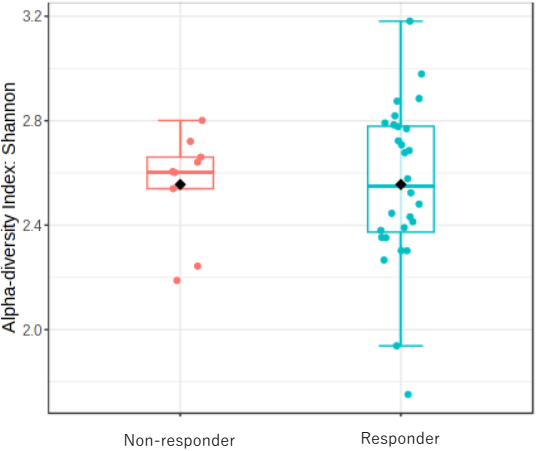

p-value: 0.49239; [T-test] statistic: 0.71149

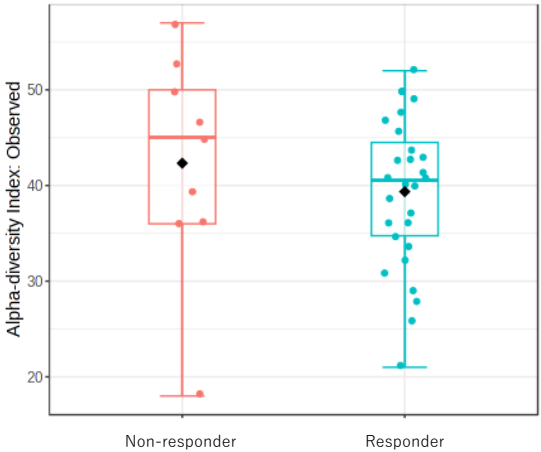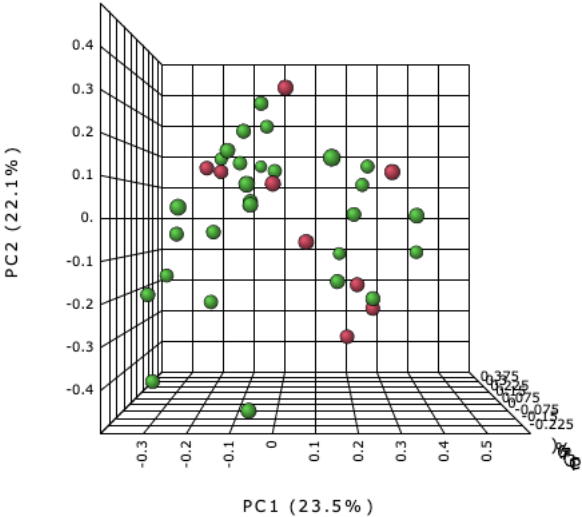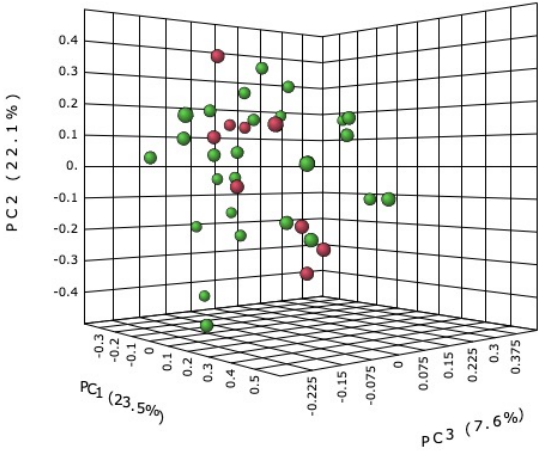

Supplementary Figure S2

*Bacteroides stercoris*

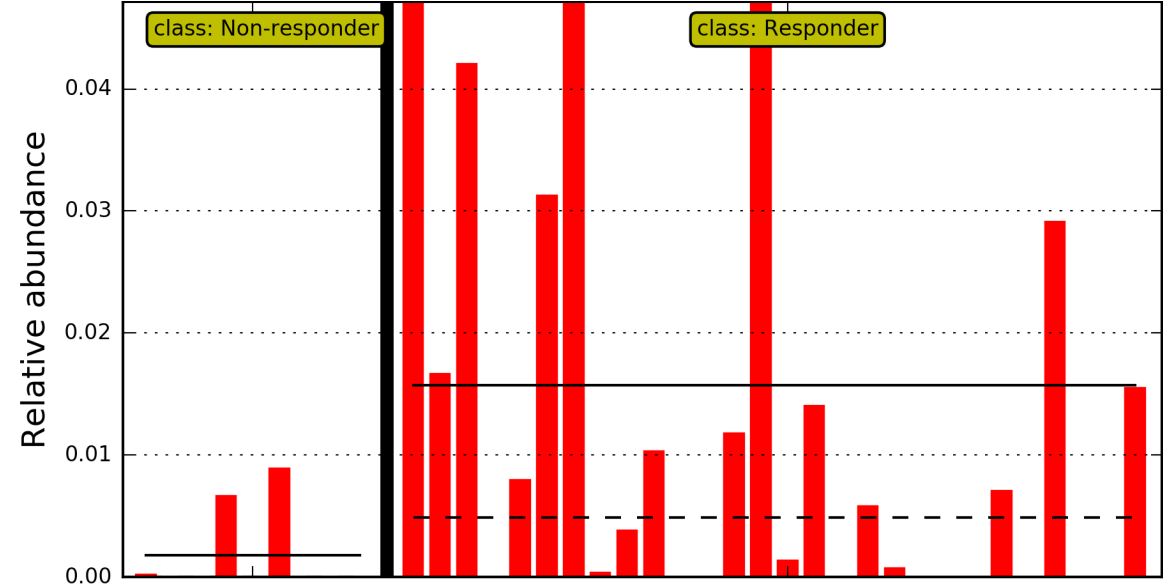

*Parabacteroides merdae*

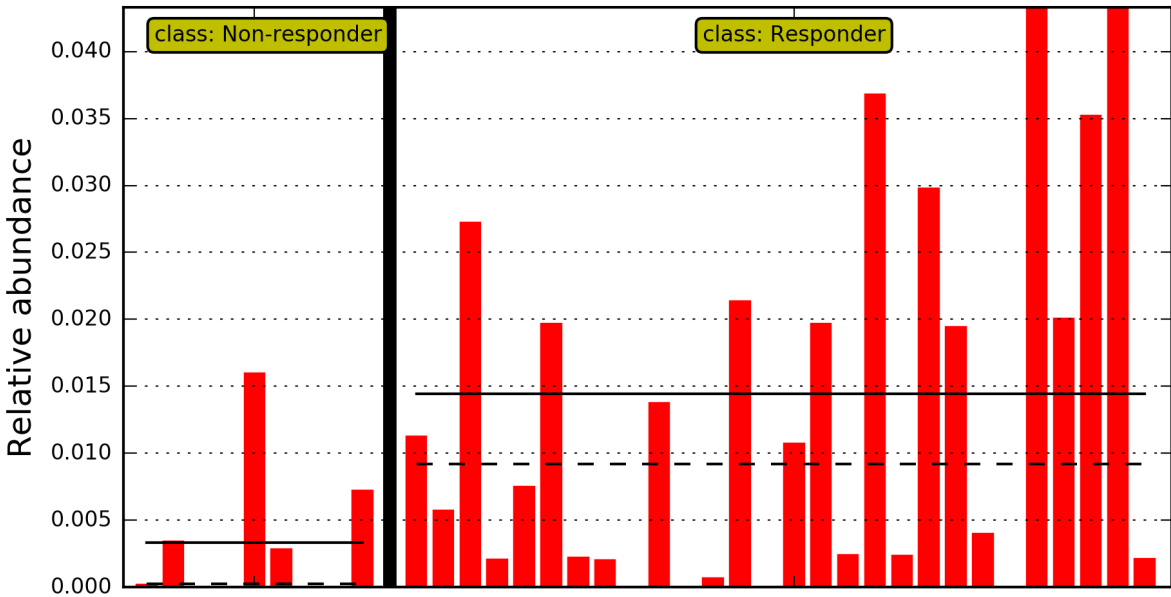

Supplementary Figure S3

Bacteroides stercoris

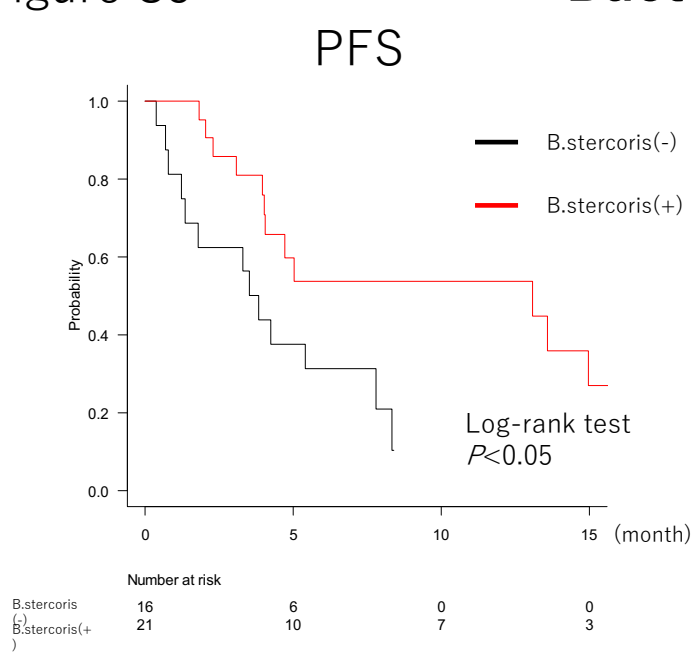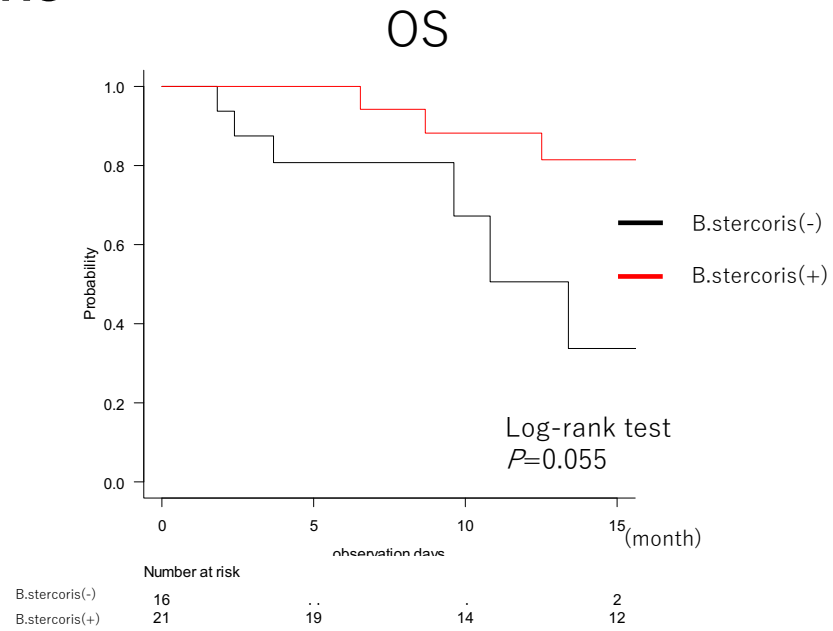

Parabacteroides merdae

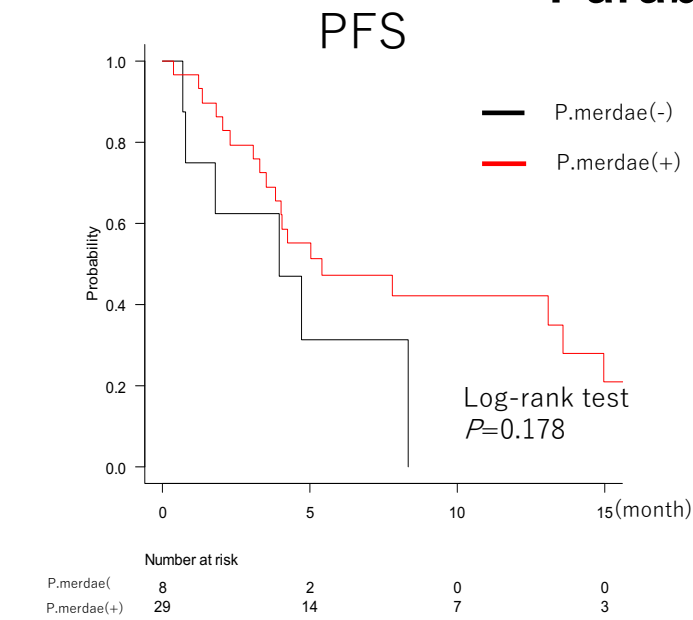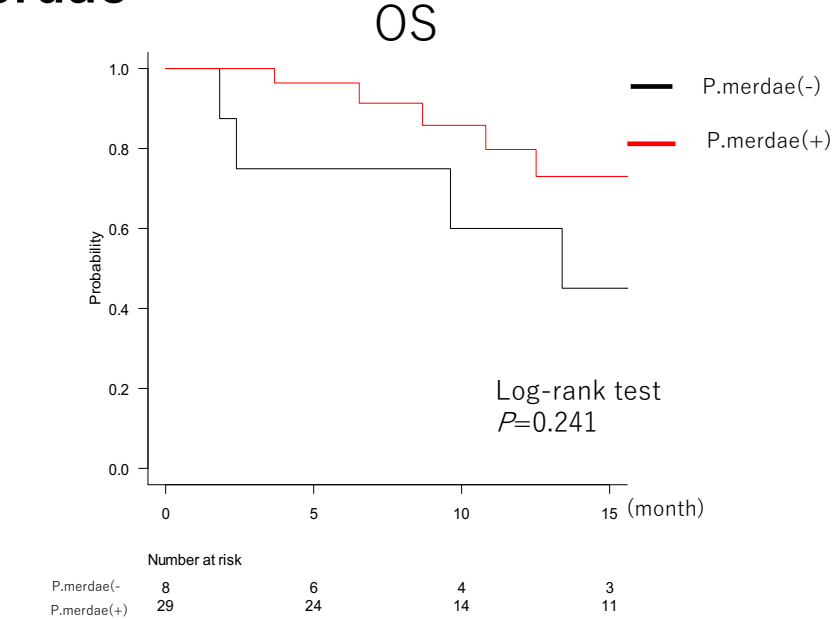

Supplementary Figure S4

PFS

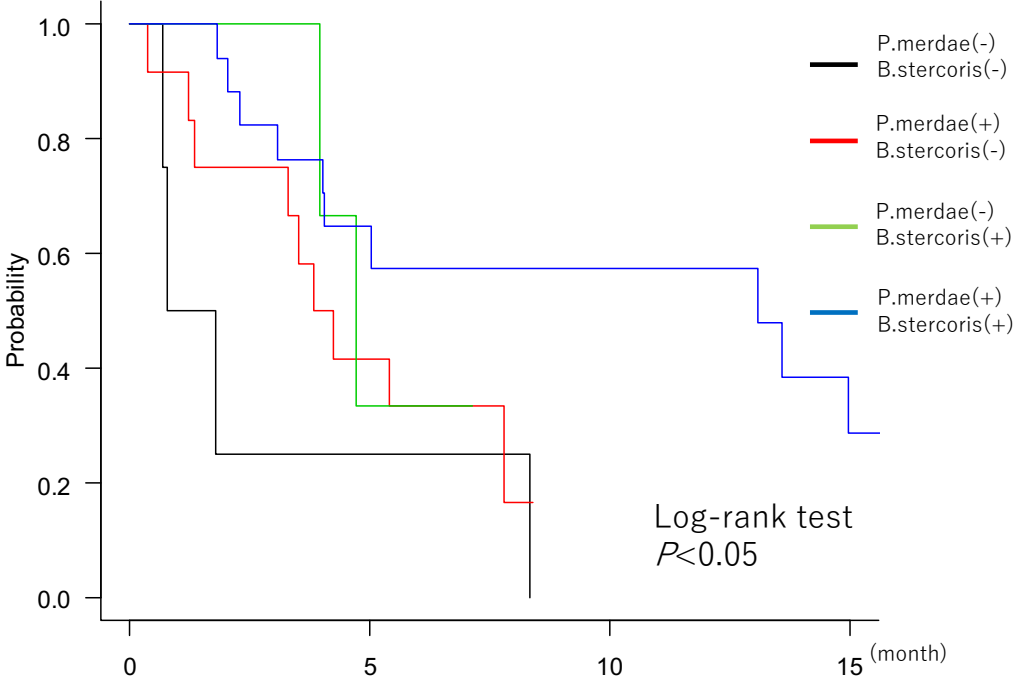

Number at risk

|                            |    |   |   |   |
|----------------------------|----|---|---|---|
| P.merdae(-) B.stercoris(-) | 4  | 1 | 0 | 0 |
| P.merdae(+) B.stercoris(-) | 12 | 5 | 0 | 0 |
| P.merdae(-) B.stercoris(+) | 4  | 1 | 0 | 0 |
| P.merdae(+) B.stercoris(+) | 17 | 9 | 7 | 3 |

OS

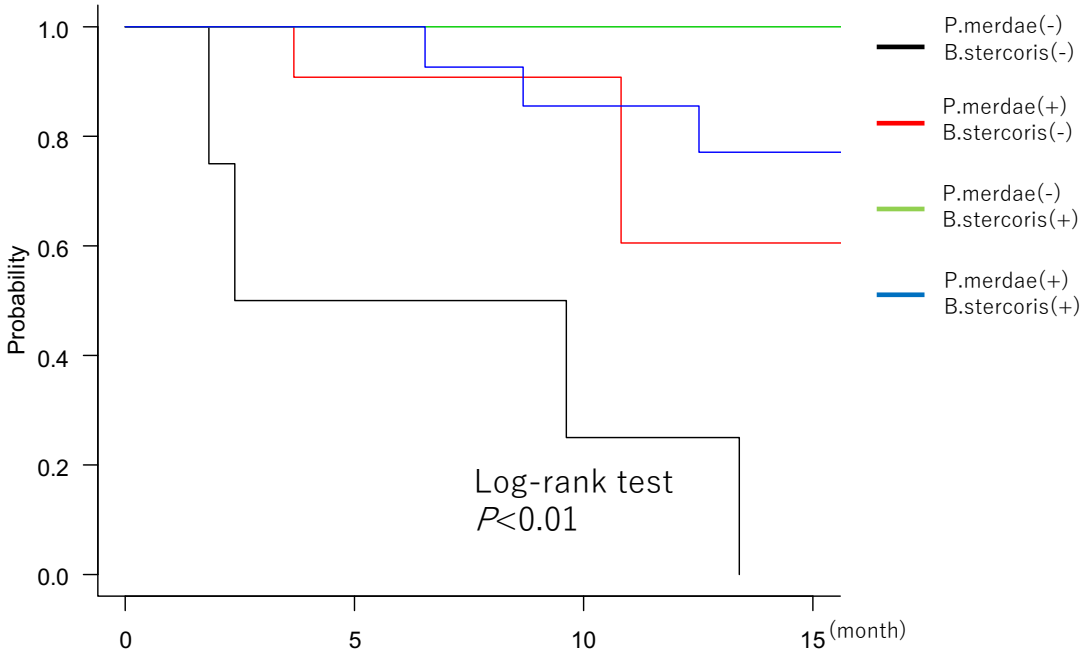

Number at risk

|                            |    |    |    |   |
|----------------------------|----|----|----|---|
| P.merdae(-) B.stercoris(-) | 4  | 2  | 1  | 0 |
| P.merdae(+) B.stercoris(-) | 12 | 9  | 3  | 2 |
| P.merdae(-) B.stercoris(+) | 4  | 4  | 3  | 3 |
| P.merdae(+) B.stercoris(+) | 17 | 15 | 11 | 9 |
